# Supplementary material
Source: publisher site journal article supplement (https://www.dovepress.com/get_supplementary_file.php?f=326242.docx)
Supplement: Supplementary file 1 [file get_supplementary_file.php]

# Supplementary Materials

**Supplementary Table 1.** Compliance of the studied SNPs with the Hardy-Weinberg Equilibrium (HWE) in ischemic stroke patients (IS) and control subjects (CS). *MAF - minor allele frequency; single nucleotide polymorphism; HWE - Hardy-Weinberg equilibrium*.

| ***Gene* SNP (Substitution) ID** | **Minor Allele** | **MAF (%)** | | **Minor Allele Carriage** | | **HWE (*P*)** | |
| --- | --- | --- | --- | --- | --- | --- | --- |
| **IS** | **CS** | **IS** | **CS** | **IS** | **CS** |
| ***MBL2 H*/*L* (-550 G>C) rs11003125** | C(L) | 34.6 | 36.8 | 52.1 | 63.2 | 0.014 | 0.13 |
| ***MBL2 X*/*Y* (*-*221 C>G) rs7096206** | G(Y) | 29.7 | 24.1 | 50 | 42.9 | 0.74 | 0.74 |
| ***MBL2 P*/*Q* (+4 C>T) rs12780112** | T(Q) | 13.2 | 22.2 | 24.8 | 35.3 | 0.96 | 0.006 |
| ***MBL2 52A*/*D* (+223 C>T) rs5030737** | T(D) | 6.4 | 6 | 12.8 | 12 | 0.46 | 0.46 |
| ***MBL2 54 A*/*B (*+230 G>A) rs1800450** | A(B) | 16.2 | 14.3 | 27.4 | 24.8 | 0.05 | 0.11 |
| ***MBL2 57 A*/*C* (+239 G>A) rs1800451** | A(C) | 1.3 | 1.9 | 2.56 | 3 | 0.89 | 7.00E-06 |
| ***FCN1* (-542 C>T) rs10120023** | T | 35.7 | 32.6 | 57.9 | 59.7 | 0.71 | 0.0053 |
| ***FCN1* (-1981 C>T) rs2989727** | T | 37.2 | 34.7 | 60.8 | 58.3 | 0.9 | 0.62 |
| ***FCN2* (-986 A>G) rs3124952** | G | 46.8 | 47.9 | 72.2 | 73.6 | 0.82 | 0.72 |
| ***FCN2* (-602 G>A) rs3124953** | A | 15 | 15.6 | 27.8 | 29.2 | 0.92 | 0.74 |
| ***FCN2* (-4 A>G) rs17514136** | G | 34.9 | 29.9 | 58.7 | 52.8 | 0.59 | 0.25 |

**Supplementary Table 2.** Linkage disequilibrium values (the absolute D' and r2) between *MBL2* gene rs11003125 (H/L), rs7096206 (X/Y), rs12780112 (P/Q), rs5030737 (A/D), rs1800450 (A/B) and rs1800451 (A/C) SNPs across ischemic stroke patients (A) and control subjects (B). *Bold values denote the alleles, which are in linkage disequilibrium and represent haplotype blocks.*

**(A)**

| ***r2***  **|*D'* |** | ***MBL2***  **rs11003125 (H/L)** | ***MBL2***  **rs7096206 (X/Y)** | ***MBL2* rs12780112 (P/Q)** | ***MBL2***  **rs5030737 (A/D)** | ***MBL2***  **rs1800450 (A/B)** | ***MBL2***  **rs1800451 (A/C)** |
| --- | --- | --- | --- | --- | --- | --- |
| ***MBL2* rs11003125 (H/L)** |  | **0.22279** | **0.08074** | **0.12937** | 0.07704 | 0.00678 |
| ***MBL2***  **rs7096206 (X/Y)** | **0.99998** |  | **0.0595** | **0.02921** | 0.08282 | 0.00507 |
| ***MBL2* rs12780112 (P/Q)** | **0.99932** | **0.97286** |  | **0.0101** | 0.02957 | 0.08504 |
| ***MBL2***  **rs5030737 (A/D)** | **0.99999** | **0.99905** | **0.98246** |  | 0.0118 | 0.00089 |
| ***MBL2***  **rs1800450 (A/B)** | 0.86635 | 0.99943 | 0.99942 | 0.94276 |  | 0.00252 |
| ***MBL2***  **rs1800451 (A/C)** | 0.99312 | 0.95651 | 0.99999 | 1.00000 | 1.00000 |  |

**(B)**

| ***r2***  **|*D'* |** | ***MBL2***  **rs11003125 (H/L)** | ***MBL2***  **rs7096206 (X/Y)** | ***MBL2* rs12780112 (P/Q)** | ***MBL2***  **rs5030737 (A/D)** | ***MBL2***  **rs1800450 (A/B)** | ***MBL2***  **rs1800451 (A/C)** |
| --- | --- | --- | --- | --- | --- | --- |
| ***MBL2* rs11003125 (H/L)** |  | **0.18467** | **0.16625** | **0.10969** | 0.09713 | 0.01083 |
| ***MBL2***  **rs7096206 (X/Y)** | **0.99959** |  | **0.09028** | **0.01998** | 0.05258 | 0.00595 |
| ***MBL2* rs12780112 (P/Q)** | **0.99997** | **0.99987** |  | **0.01811** | 0.02136 | 0.06721 |
| ***MBL2***  **rs5030737 (A/D)** | **0.99989** | **0.99255** | **0.99647** |  | 0.01066 | 0.00123 |
| ***MBL2***  **rs1800450 (A/B)** | 0.99954 | 0.9979 | 0.67058 | 0.9996 |  | 0.00319 |
| ***MBL2***  **rs1800451 (A/C)** | 0.98437 | 0.98996 | 0.99999 | 1.00000 | 1.00000 |  |

**Supplementary Table 3.** LD values (the absolute D' and r2) between *FCN1* gene rs10120023 and rs2989727 SNPs and *FCN2* gene rs3124952, rs3124953 and rs17514136 SNPs across A) ischemic stroke patients (A) and control subjects (B). *Bold values denote the alleles, which are in linkage disequilibrium and represent haplotype blocks.*

**(A)**

| ***r2***  **|*D'* |** | ***FCN1* rs10120023** | ***FCN1***  **rs2989727** | ***FCN2***  **rs3124952** | ***FCN2***  **rs3124953** | ***FCN2* rs17514136** |
| --- | --- | --- | --- | --- | --- |
| ***FCN1* rs10120023** |  | **0.32525** | 0.03755 | 0.03254 | 0.10781 |
| ***FCN1***  **rs2989727** | **0.98799** |  | 0.01337 | 0.03385 | 0.047 |
| ***FCN2***  **rs3124952** | 0.27706 | 0.14089 |  | **0.14992** | **0.42885** |
| ***FCN2***  **rs3124953** | 0.57435 | 0.33976 | **0.97917** |  | **0.08135** |
| ***FCN2* rs17514136** | 0.33410 | 0.38219 | **0.95268** | **0.92399** |  |

**(B)**

| ***r2***  **|*D'* |** | ***FCN1* rs10120023** | ***FCN1***  **rs2989727** | ***FCN2***  **rs3124952** | ***FCN2***  **rs3124953** | ***FCN2* rs17514136** |
| --- | --- | --- | --- | --- | --- |
| ***FCN1* rs10120023** |  | **0.25332** | 0.06141 | 0.00778 | 0.13871 |
| ***FCN1***  **rs2989727** | **0.99141** |  | 0.00097 | 0.02736 | 0.02181 |
| ***FCN2***  **rs3124952** | 0.34147 | 0.04457 |  | **0.199** | **0.45947** |
| ***FCN2***  **rs3124953** | 0.29449 | 0.28034 | **0.99431** |  | **0.05581** |
| ***FCN2* rs17514136** | 0.39732 | 0.31032 | **0.99643** | **0.84137** |  |
